# Supplementary material for: Synthesis and Evaluation of New Benzodioxole- Based Thiosemicarbazone Derivatives as Potential Antitumor Agents
Source: PubMed Central journal article supplement (PMC6273715; doi:10.3390/molecules21111598), 2016-11-22
Supplement: molecules-21-01598-s001.pdf [file molecules-21-01598-s001.pdf]

# Supplementary Materials: Synthesis and Evaluation of New Benzodioxole-Based Thiosemicarbazone Derivatives as Potential Antitumor Agents

Mehlika Dilek Altıntop, Halide Edip Temel, Belgin Sever, Gülşen Akalın Çiftçi and Zafer Asım Kaplancıklı

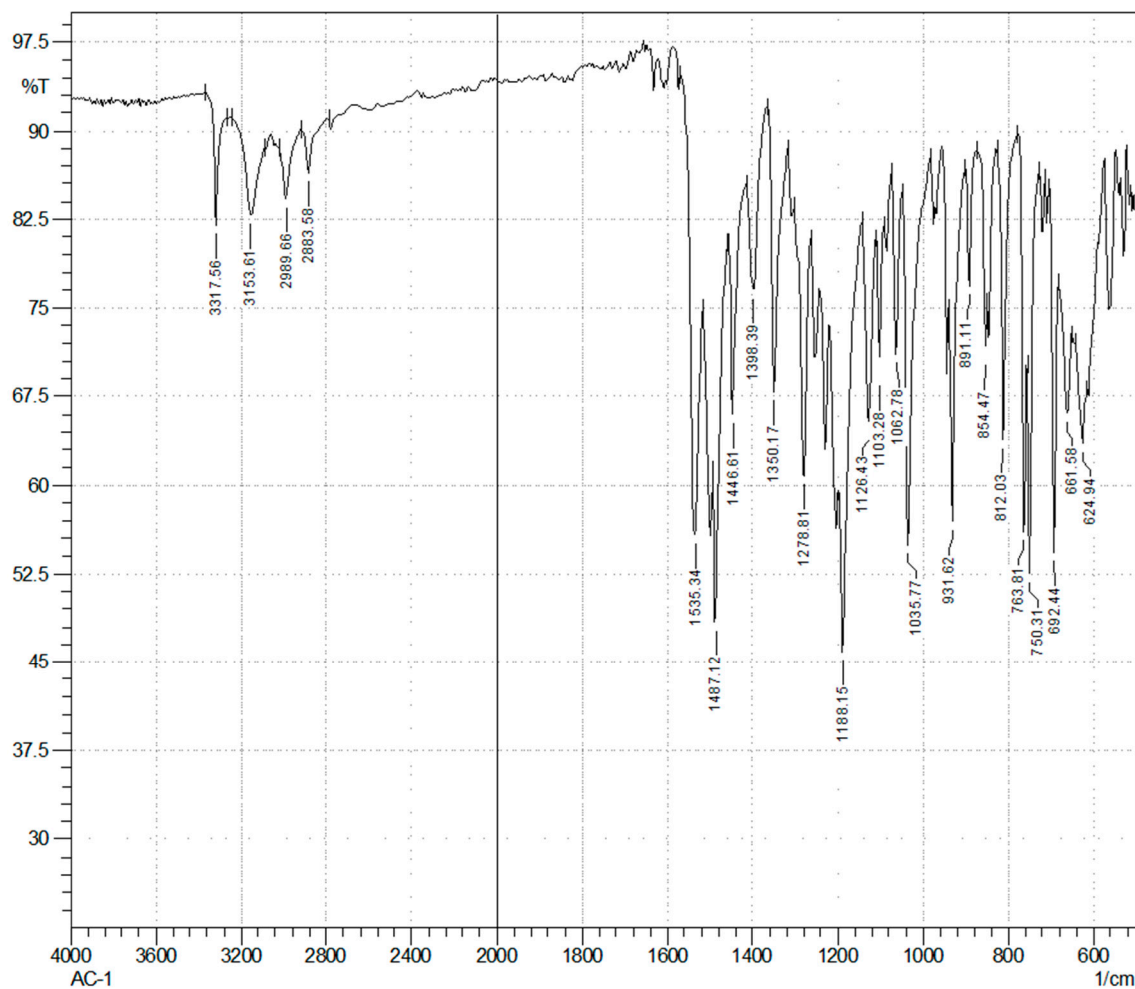

Figure S1. IR Spectrum of Compound 1.

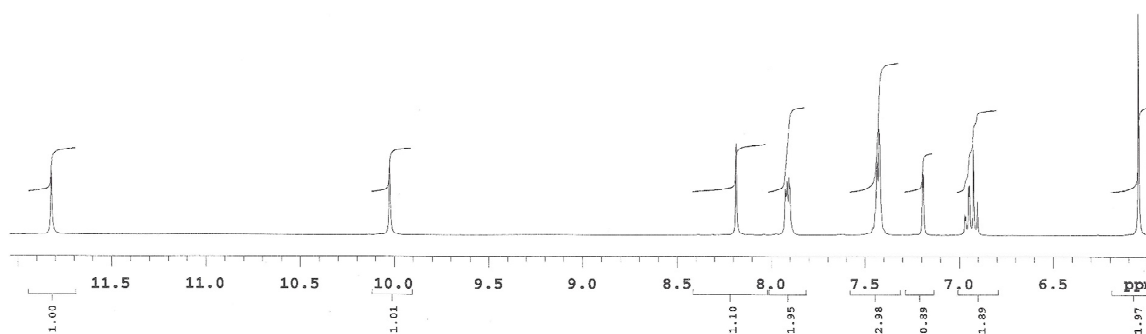

Figure S2. <sup>1</sup>H-NMR Spectrum of Compound 1 (6.5–11.5 ppm).

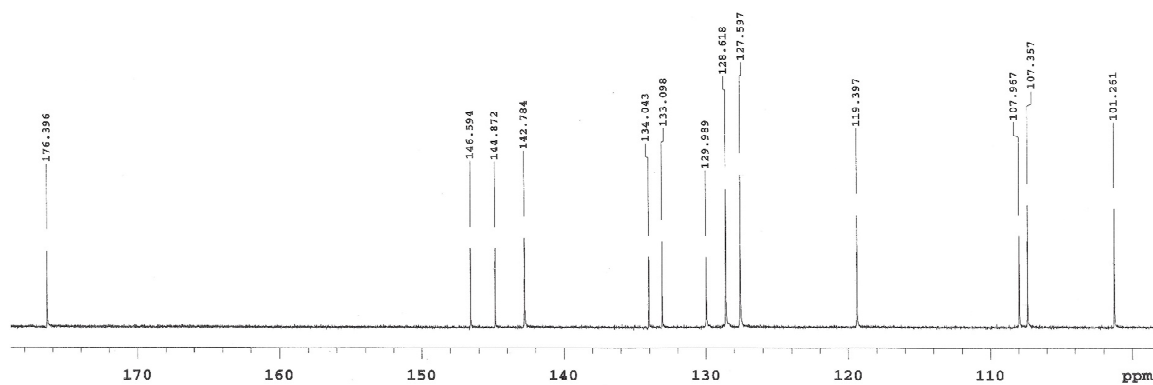

Figure S3. <sup>13</sup>C-NMR Spectrum of Compound 1 (101–176 ppm).

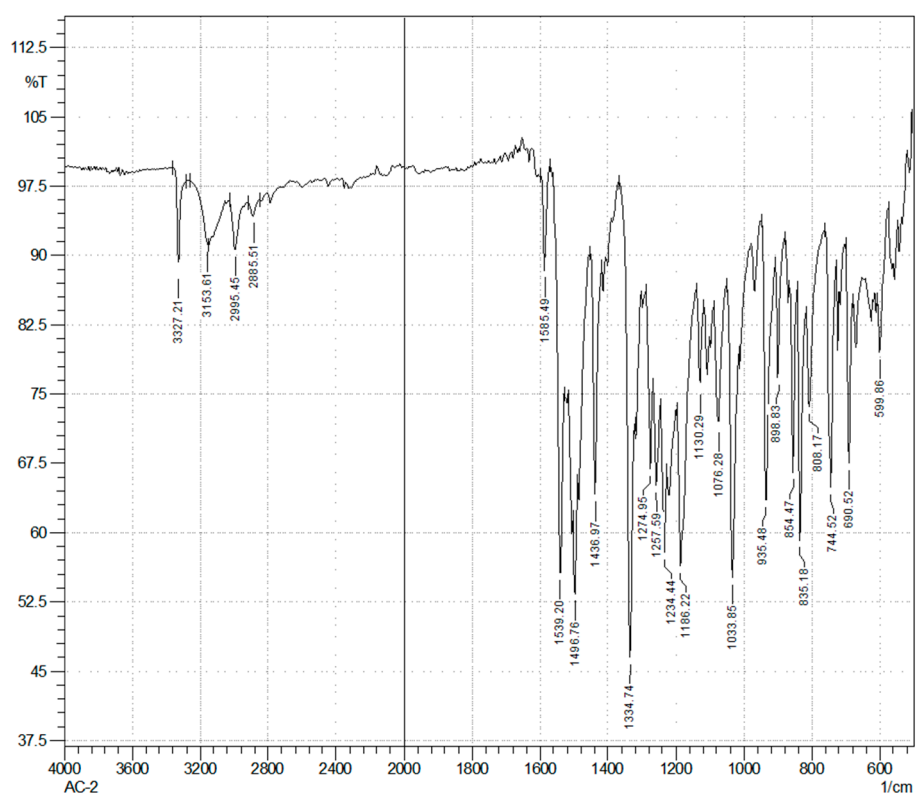

Figure S4. IR Spectrum of Compound 2.

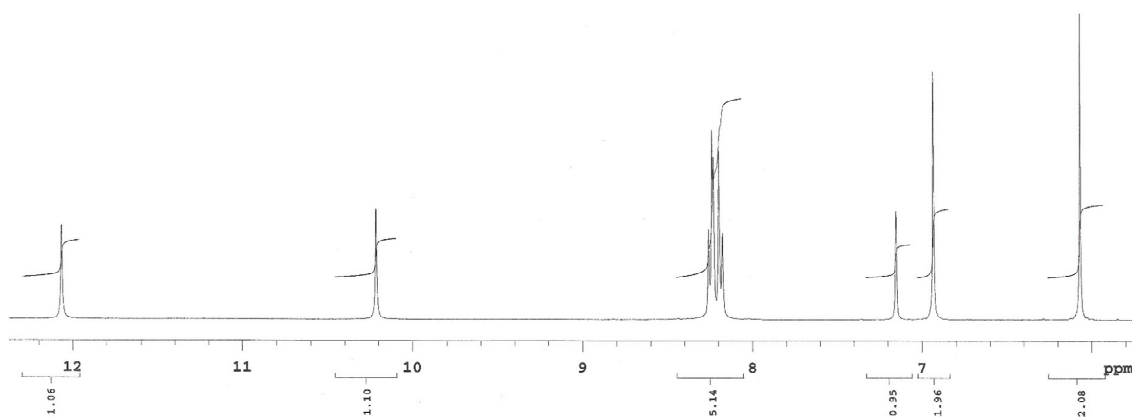

Figure S5. <sup>1</sup>H-NMR Spectrum of Compound 2 (35–44 ppm).

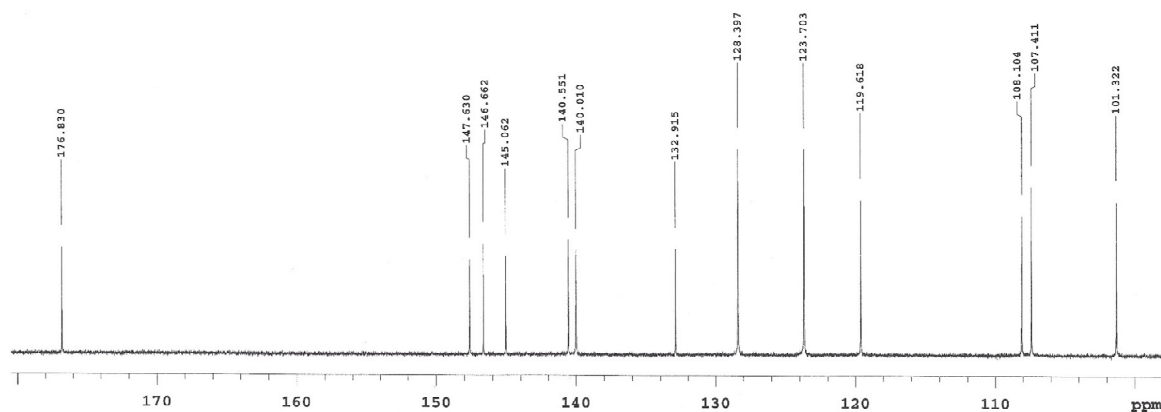

Figure S6.  $^{13}\text{C}$ -NMR Spectrum of Compound 2 (110–170 ppm).

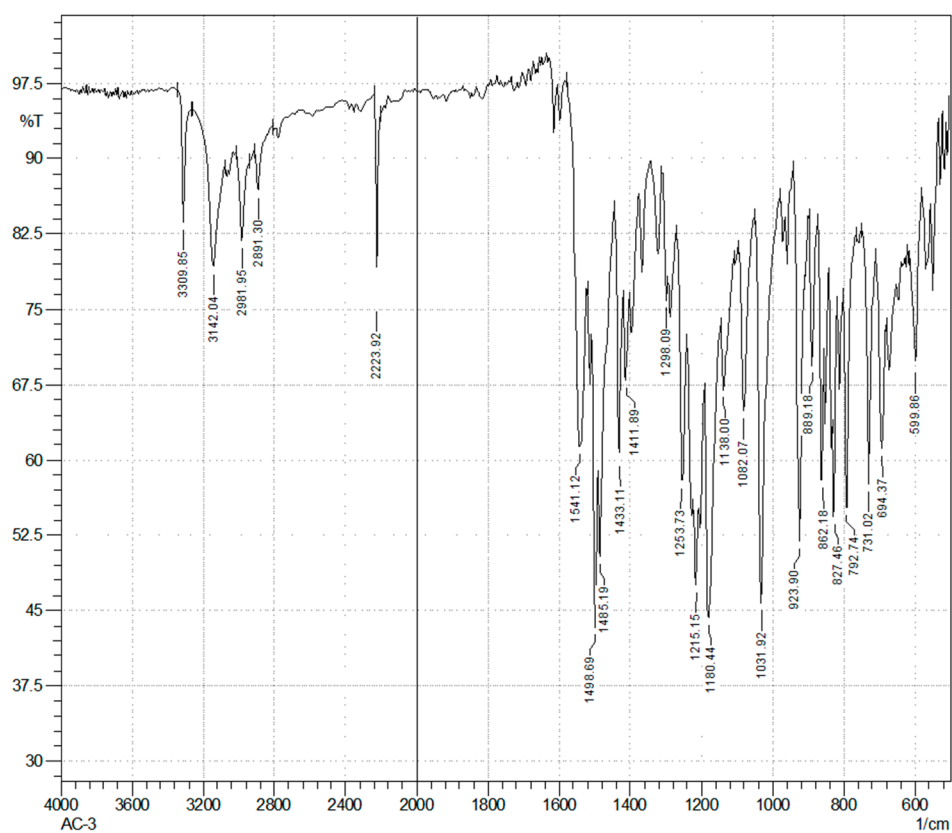

Figure S7. IR Spectrum of Compound 3.

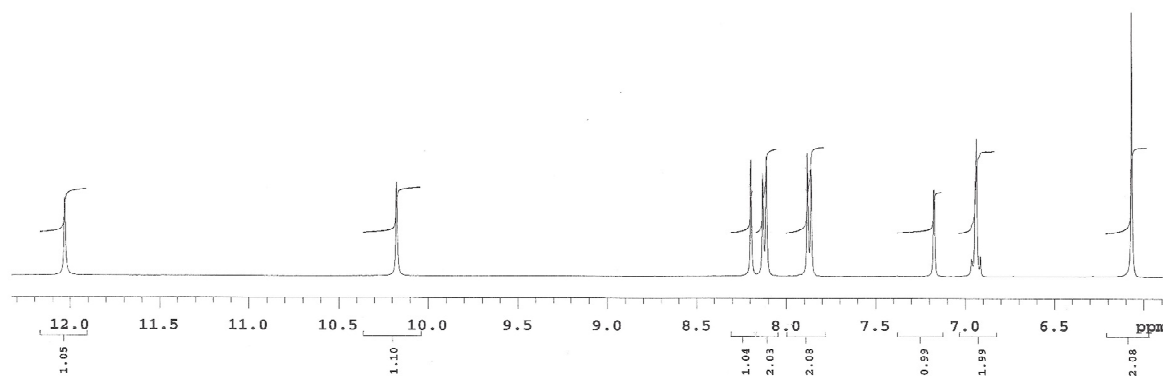

Figure S8.  $^1\text{H}$ -NMR Spectrum of Compound 3 (6.5–12 ppm).

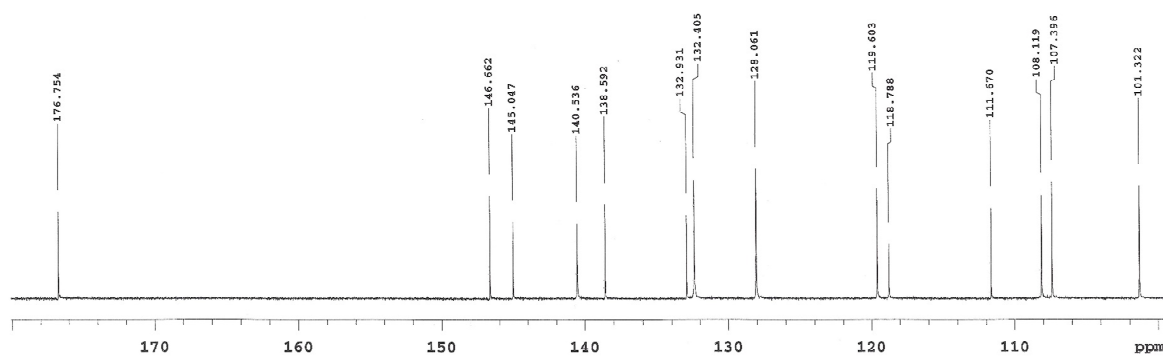

Figure S9. <sup>13</sup>C-NMR Spectrum of Compound 3 (101–176 ppm).

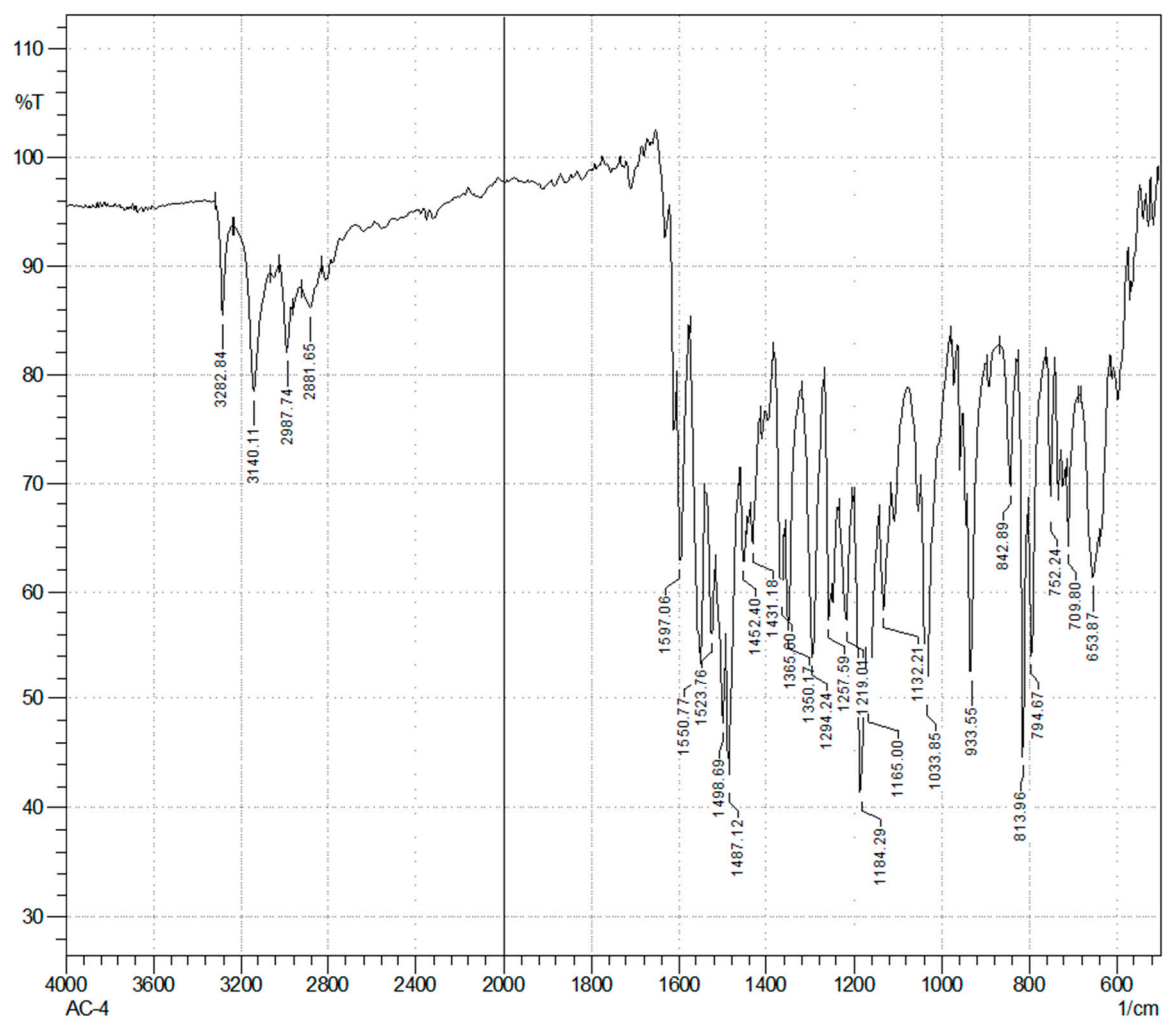

Figure S10. IR Spectrum of Compound 4.



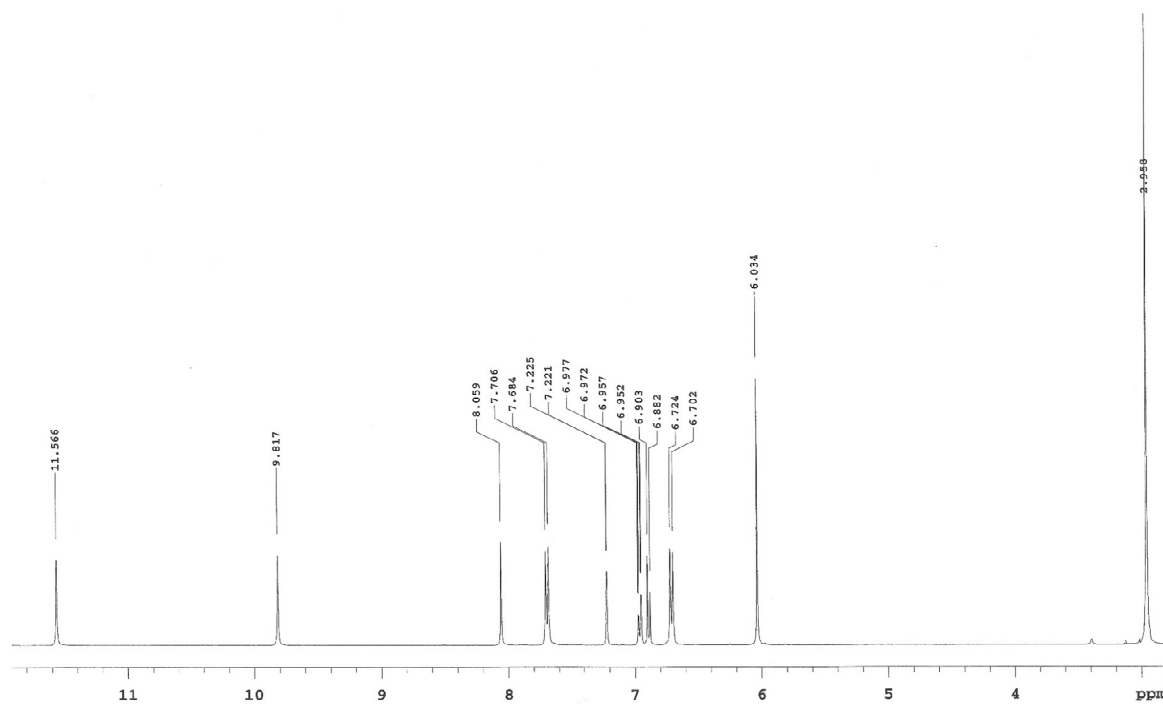

Figure S11. <sup>1</sup>H-NMR Spectrum of Compound 4 (4–11 ppm).

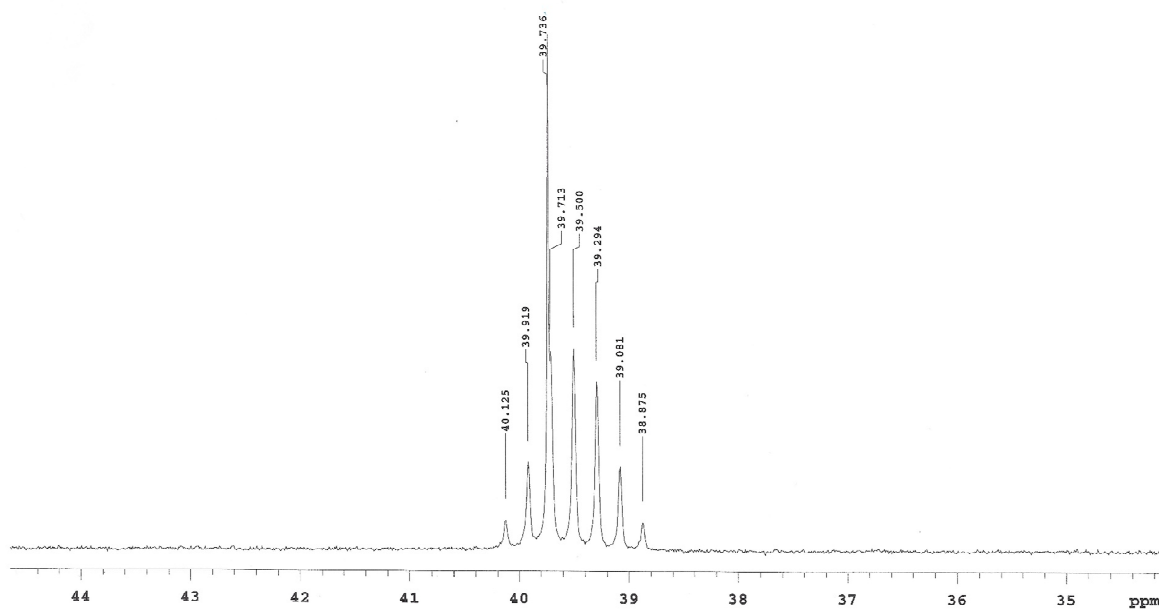

Figure S12. <sup>13</sup>C-NMR Spectrum of Compound 4 (35–44 ppm).

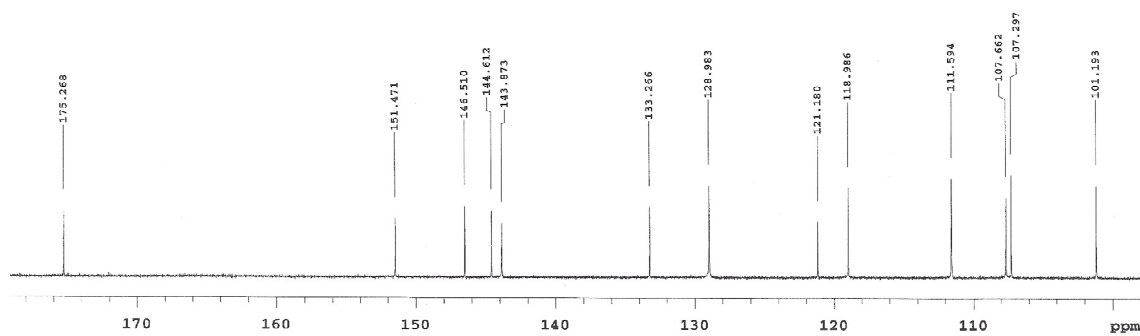Figure S13. <sup>13</sup>C-NMR Spectrum of Compound 4 (101–175 ppm).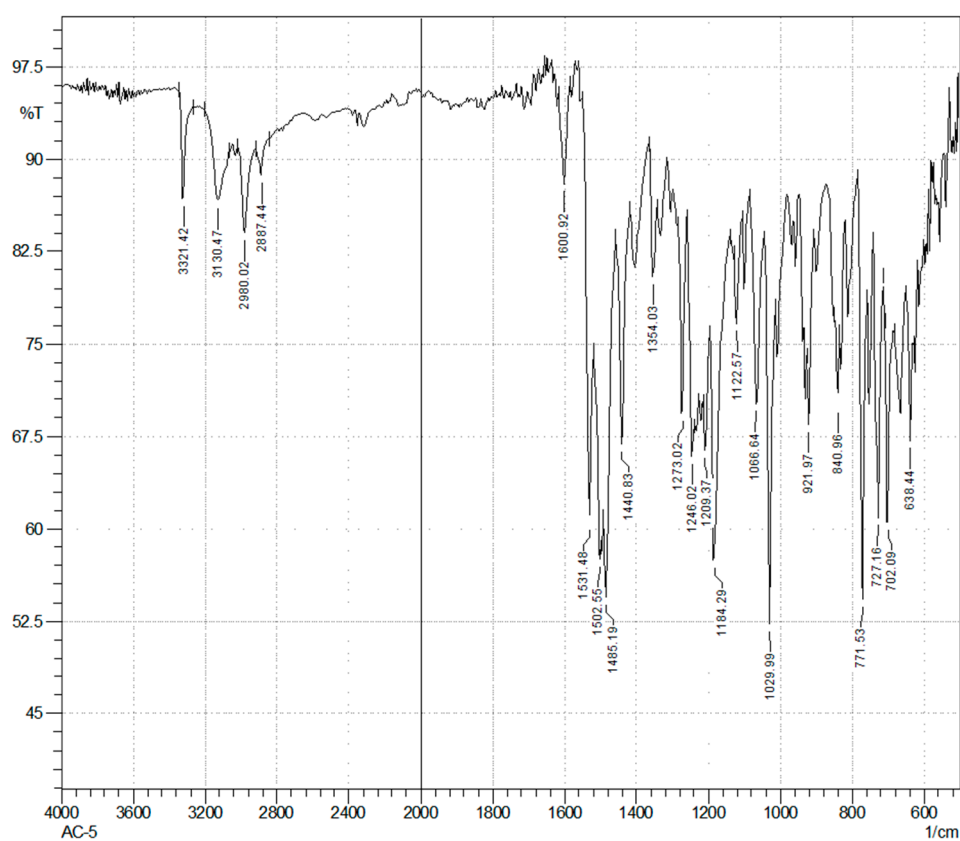

Figure S14. IR Spectrum of Compound 5.

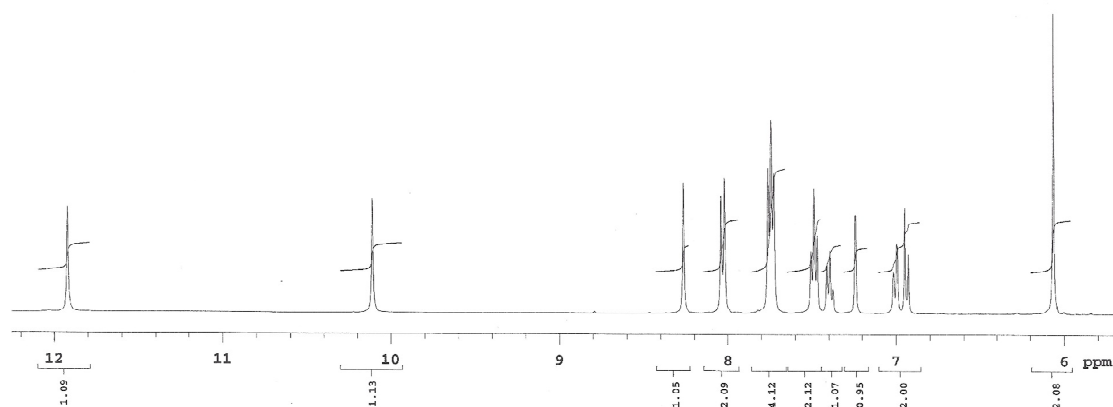Figure S15. <sup>1</sup>H-NMR Spectrum of Compound 5 (6–12 ppm).

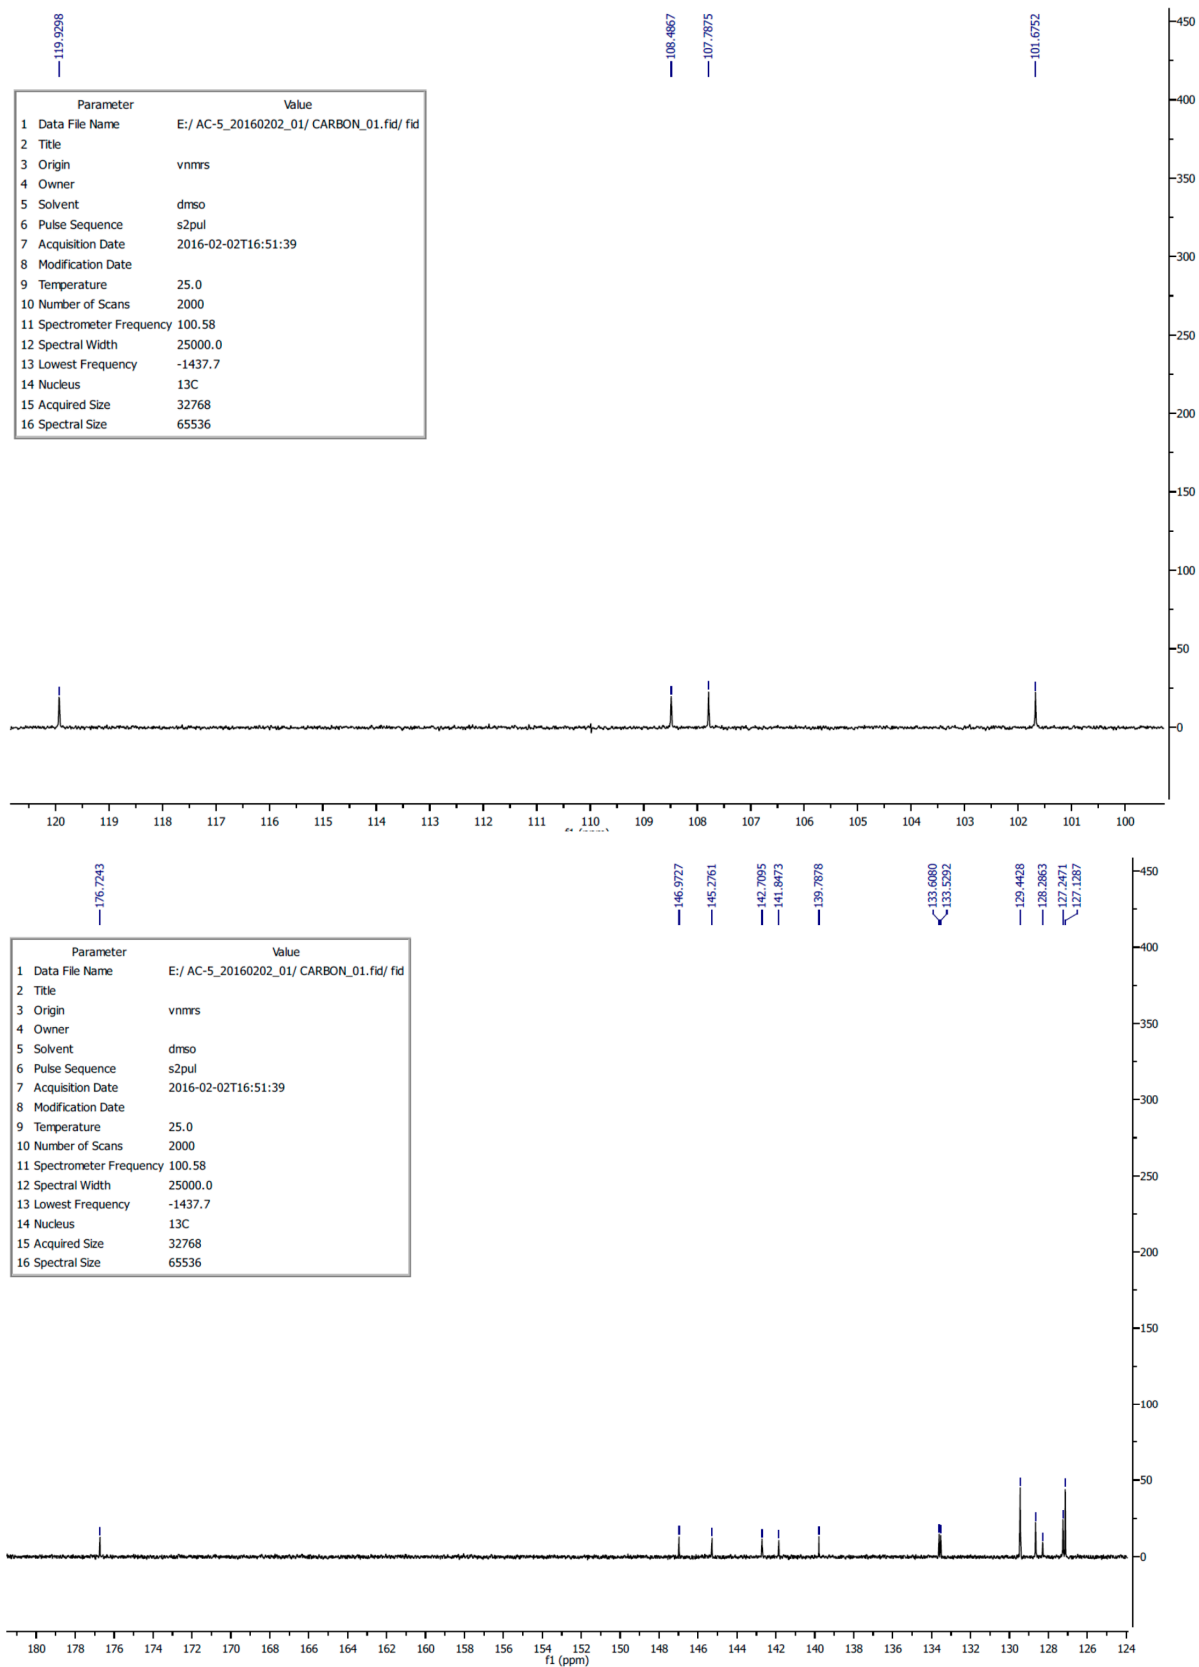

**Figure S16.**  $^{13}\text{C}$ -NMR Spectrum of Compound 5 (101–119, 127–176 ppm).

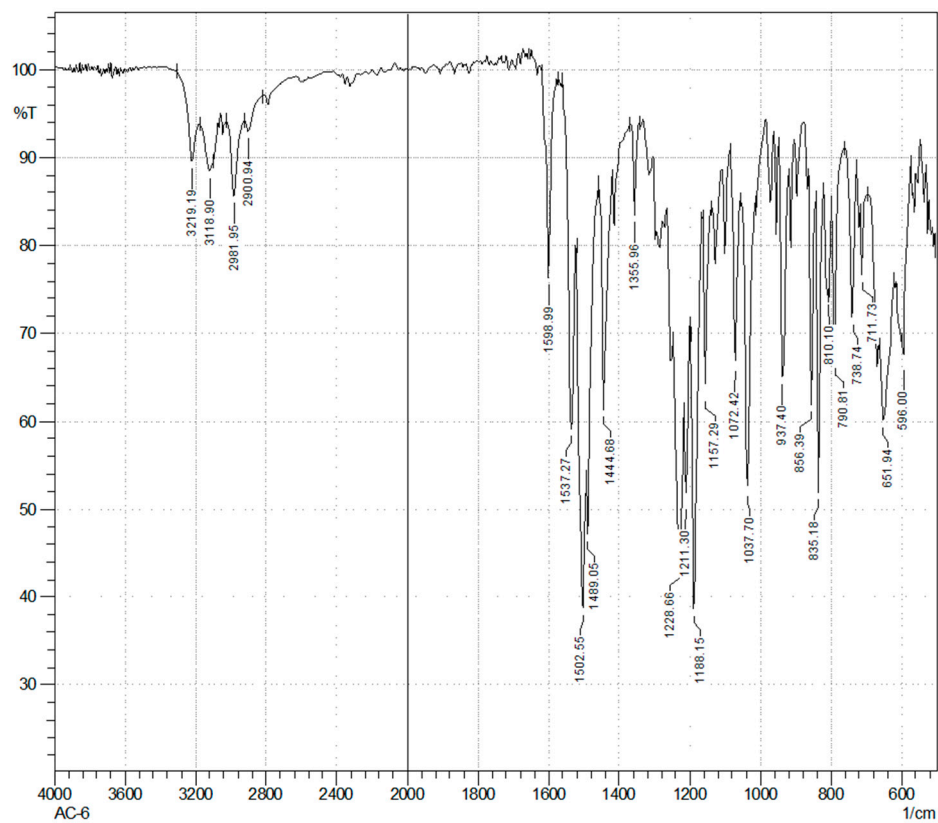

Figure S17. IR Spectrum of Compound 6.

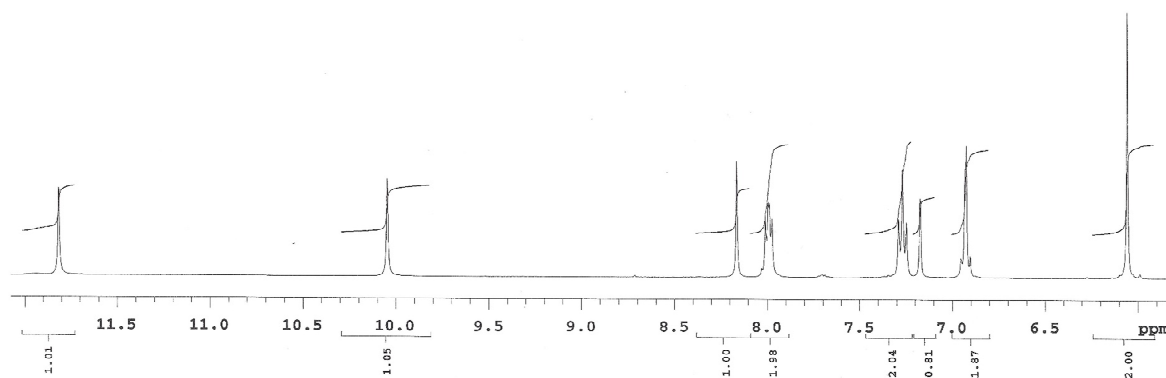Figure S18. <sup>1</sup>H-NMR Spectrum of Compound 6 (6.5–11 ppm).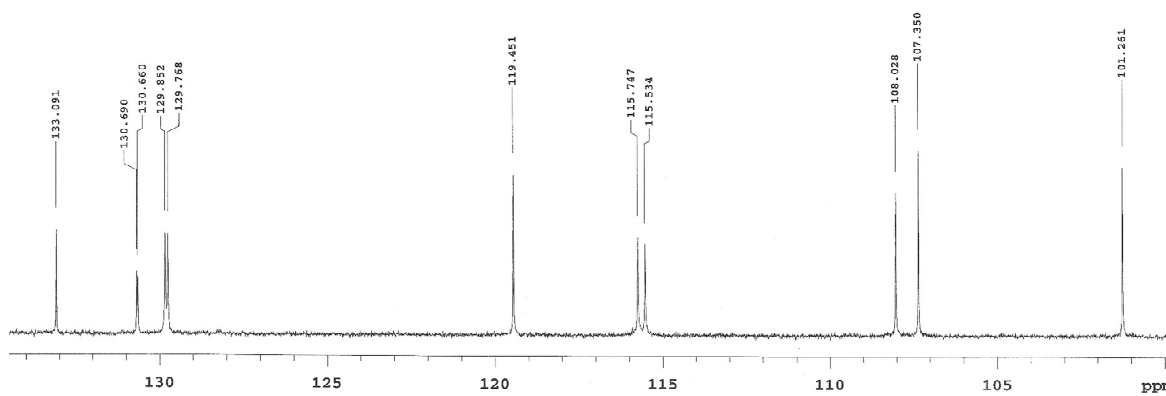Figure S19. <sup>13</sup>C-NMR Spectrum of Compound 6 (101–133 ppm).

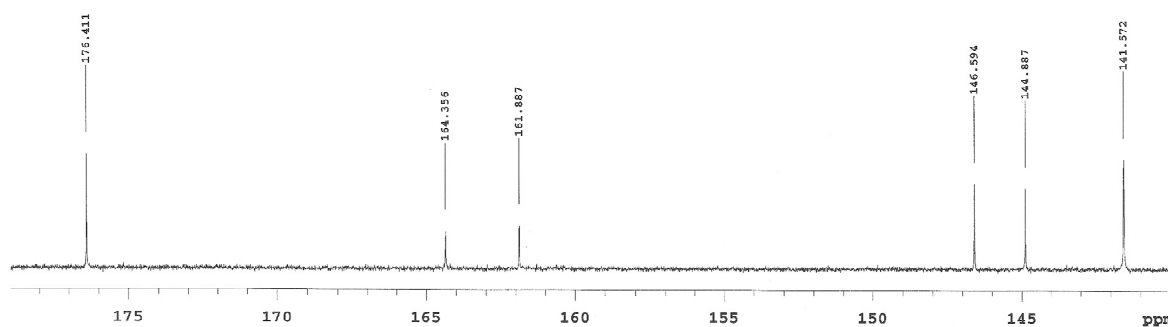

Figure S20. <sup>13</sup>C-NMR Spectrum of Compound 6 (141–176 ppm).

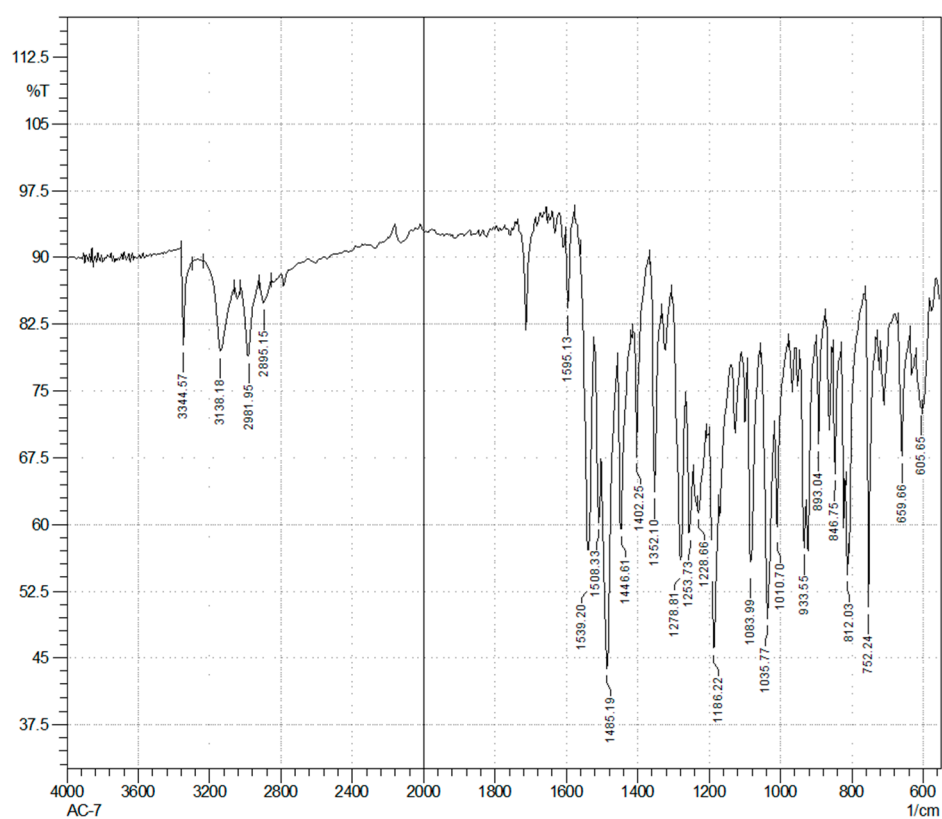

Figure S21. IR Spectrum of Compound 7.

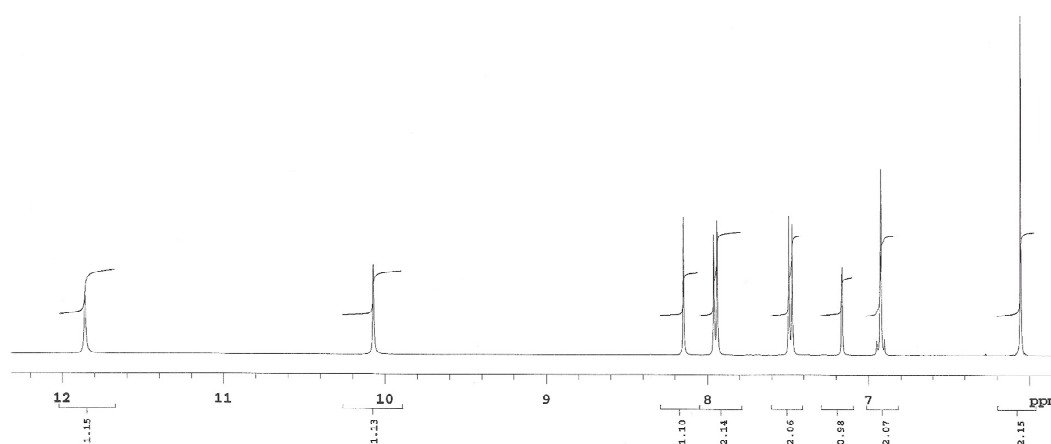

Figure S22. <sup>1</sup>H-NMR Spectrum of Compound 7 (7–12 ppm).

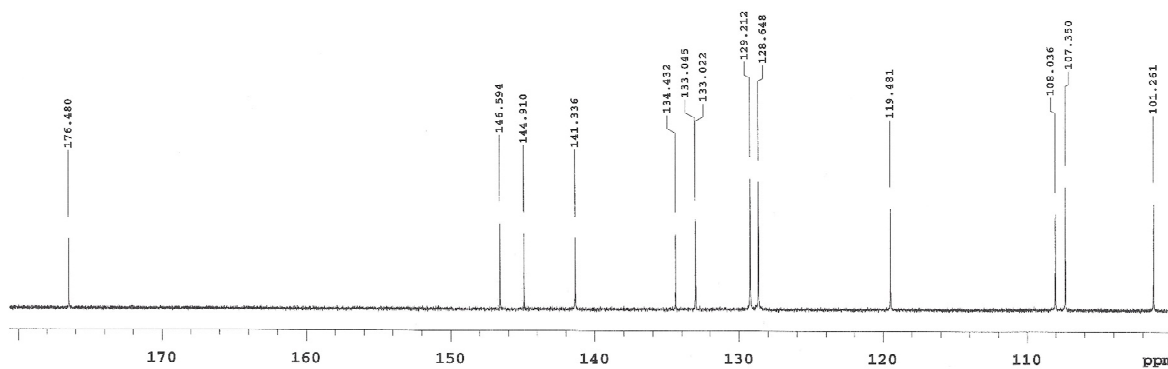

Figure S23.  $^{13}\text{C}$ -NMR Spectrum of Compound 7 (101–176 ppm).

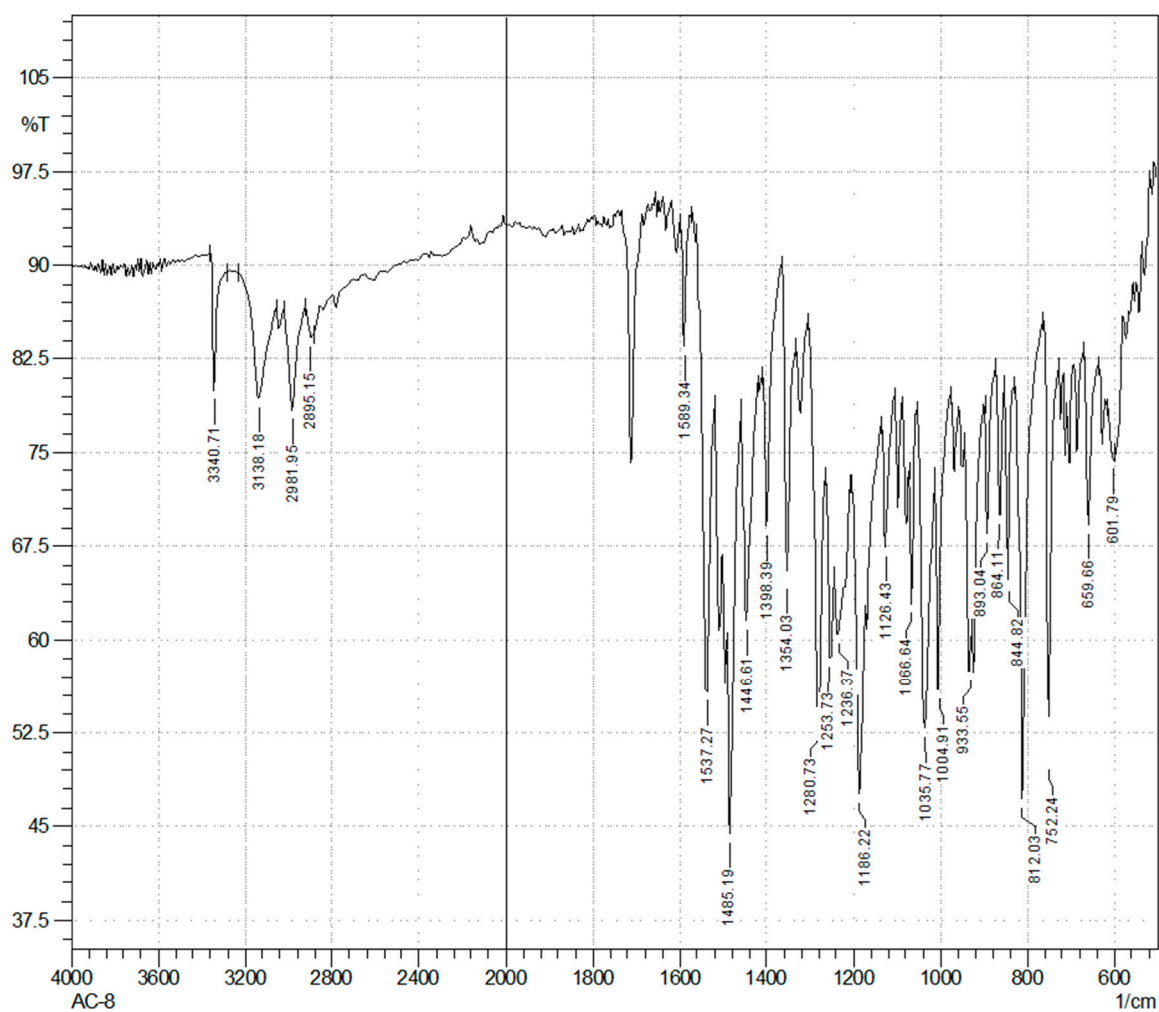

Figure S24. IR Spectrum of Compound 8.

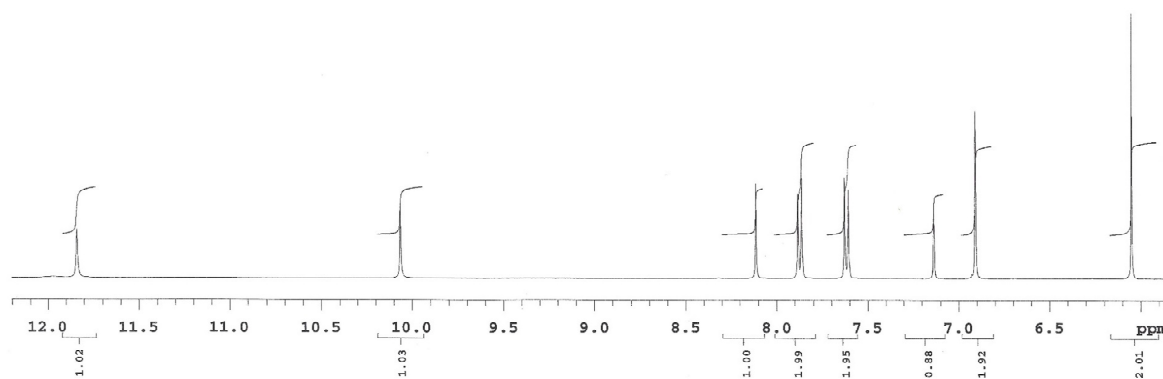

Figure S25. <sup>1</sup>H-NMR Spectrum of Compound 8 (6.5–12 ppm).

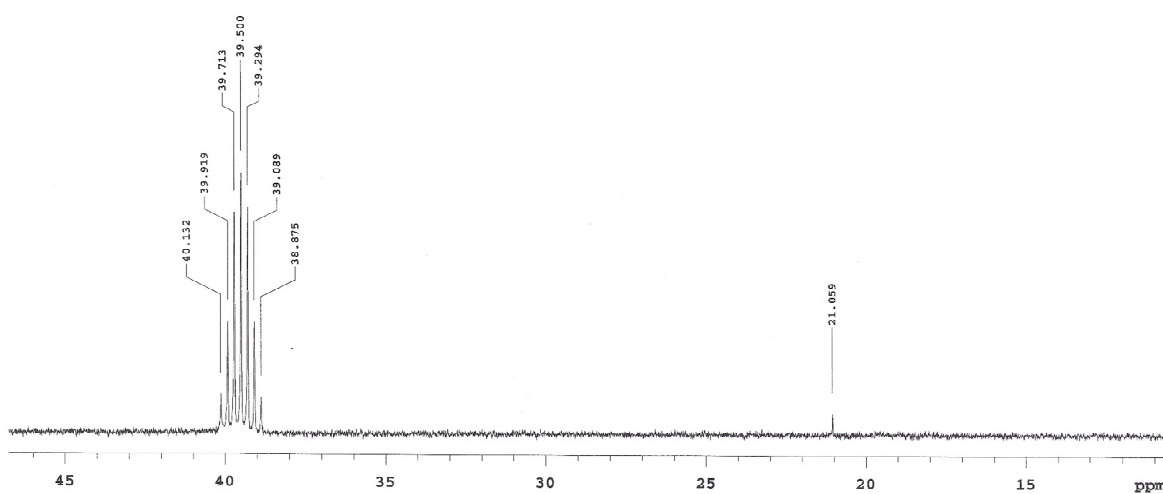

Figure S26. <sup>13</sup>C-NMR Spectrum of Compound 8 (20–45 ppm).

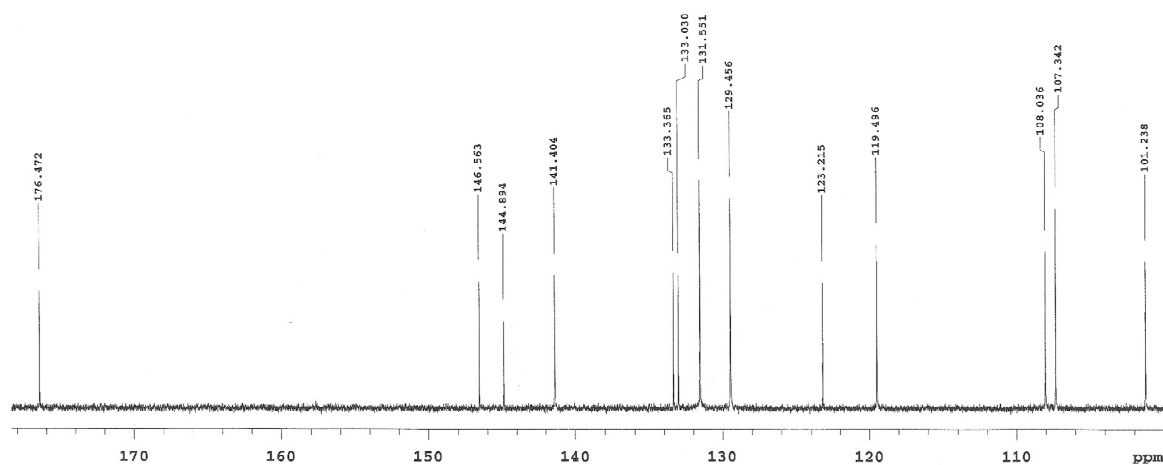

Figure S27. <sup>13</sup>C-NMR Spectrum of Compound 8 (101–176 ppm).

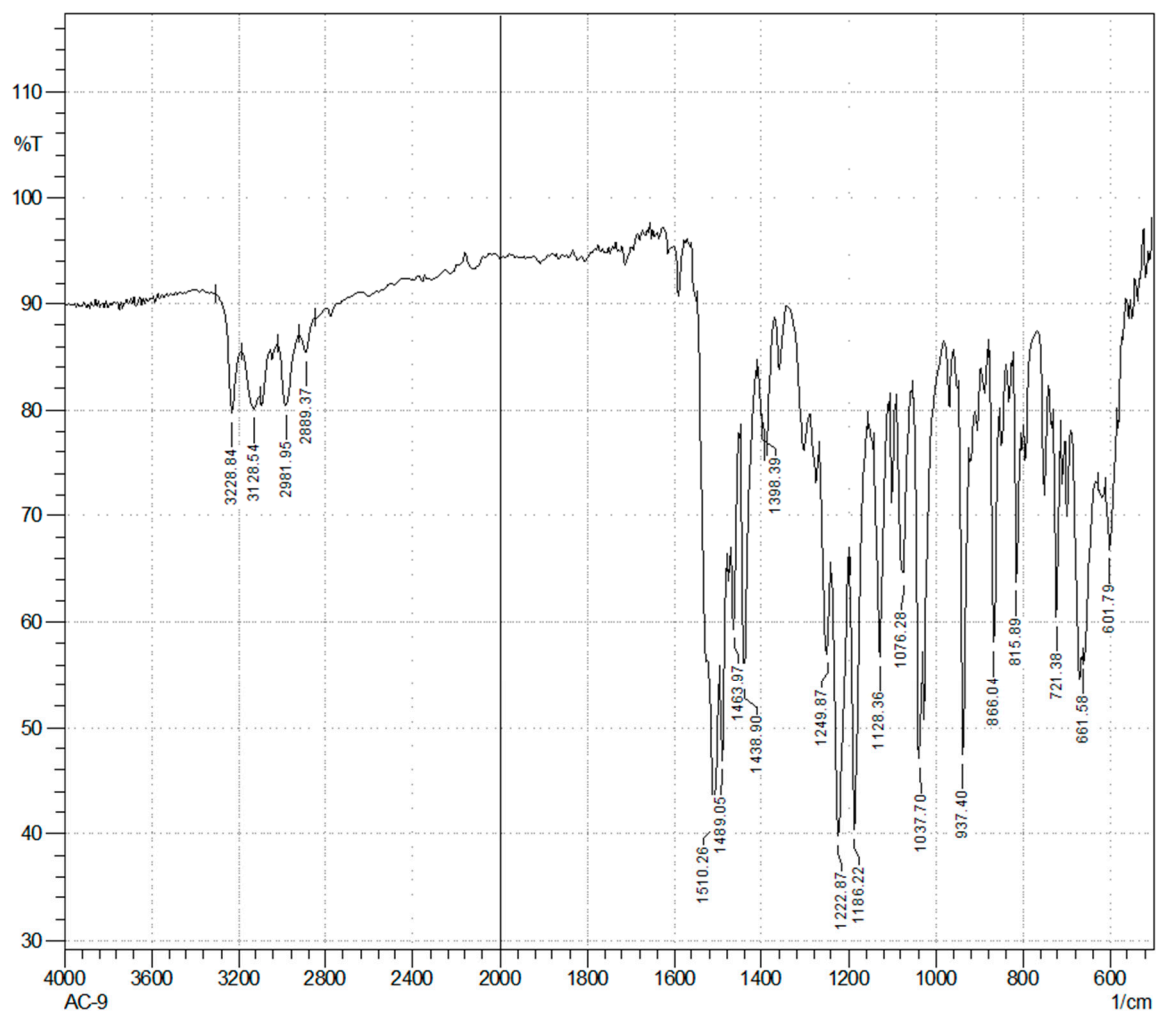

Figure S28. IR Spectrum of Compound 9.

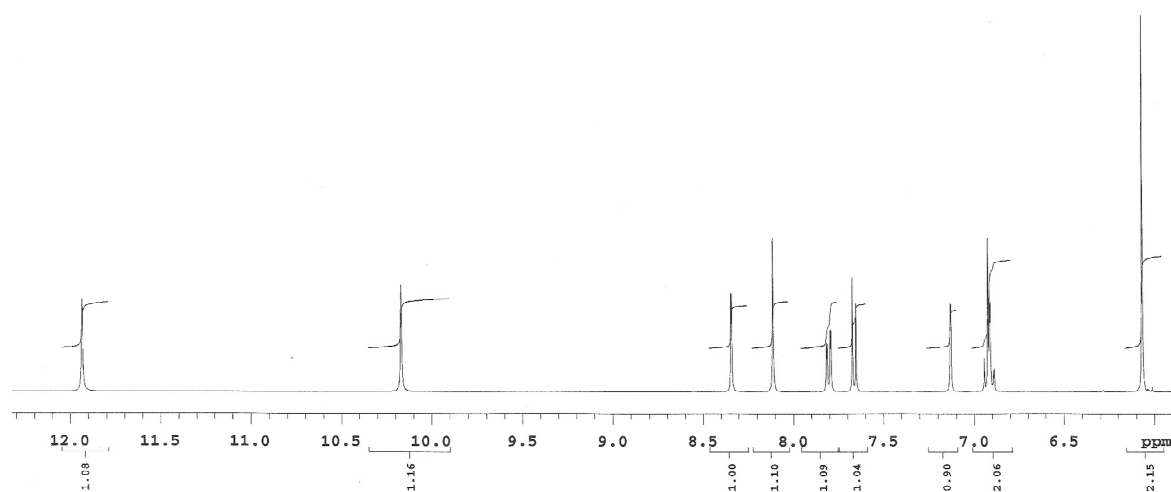Figure S29. <sup>1</sup>H-NMR Spectrum of Compound 9 (6.5–12 ppm).



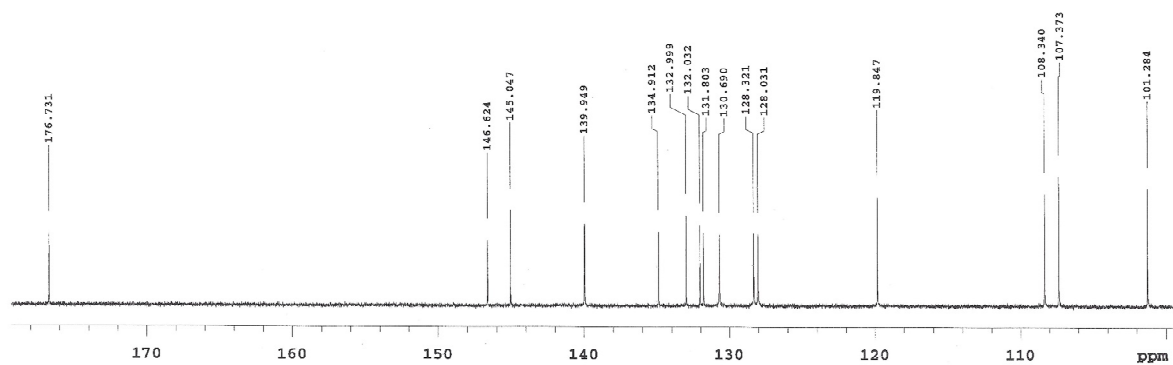

Figure S30.  $^{13}\text{C}$ -NMR Spectrum of Compound 9 (101–176 ppm).

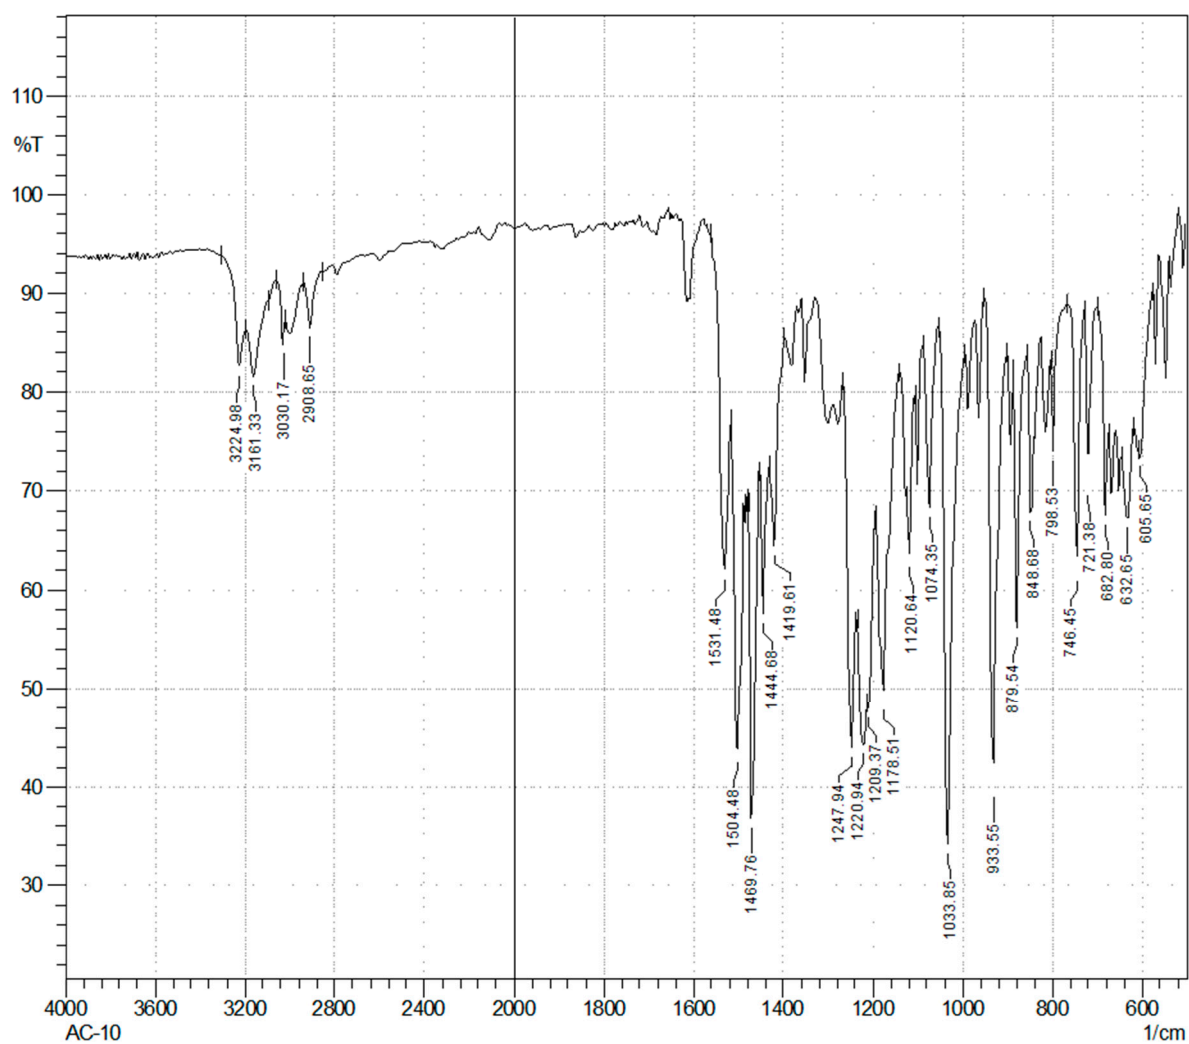

Figure S31. IR Spectrum of Compound 10.

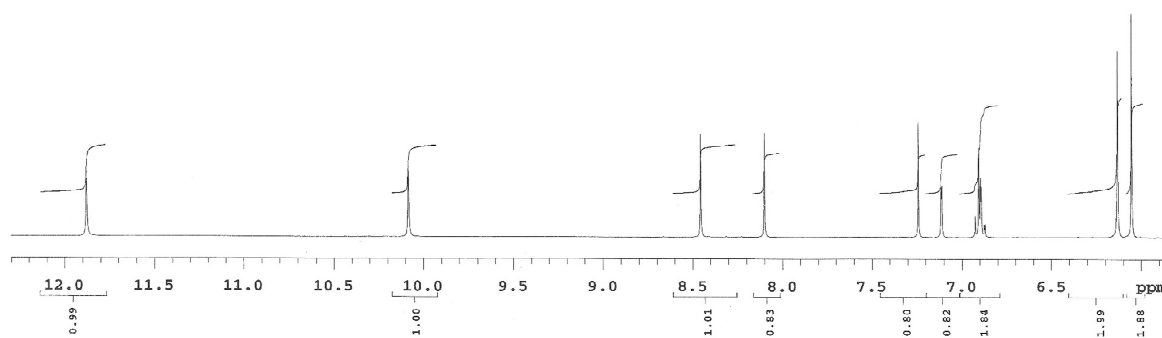

32. <sup>1</sup>H-NMR Spectrum of Compound 10 (6.5–12 ppm)

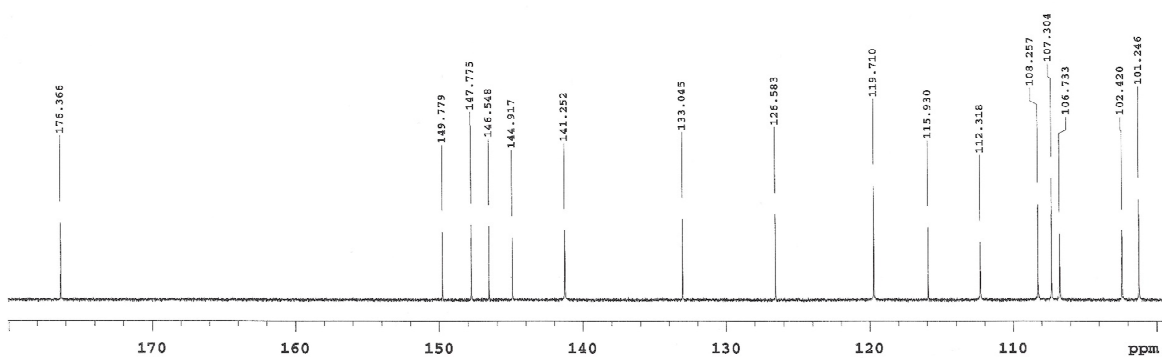

Figure 33. <sup>13</sup>C-NMR Spectrum of Compound 10 (101–176 ppm).
